# Supplementary material for: MRC Centre Neuromuscular Biobank (Newcastle and London): Supporting and facilitating rare and neuromuscular disease research worldwide
Source: PubMed Central journal article supplement (PMC5678293; doi:10.1016/j.nmd.2017.07.001), 2017-11
Supplement: mmc2.pdf [file mmc2.pdf]

**FORM F3: TRANSFER RECORD: SAMPLE FROM DIAGNOSTIC ARCHIVE TO BIOBANK**

| SAMPLE INFORMATION                  |                                           |                                                                                                                        |  |
|-------------------------------------|-------------------------------------------|------------------------------------------------------------------------------------------------------------------------|--|
| <b>Request date</b>                 |                                           |                                                                                                                        |  |
| <b>Sample type</b>                  |                                           | <b>Sample ID</b>                                                                                                       |  |
| <b>Consent</b>                      | <b>Required?</b>                          | <b>Consent type</b>                                                                                                    |  |
|                                     | <input checked="" type="checkbox"/> Yes → | <input type="checkbox"/> GOSH/Hammersmith <input type="checkbox"/> Referral <input type="checkbox"/> Biobank           |  |
|                                     | <input type="checkbox"/> No →             | <input type="checkbox"/> Existing holding, date received    /    /<br><input type="checkbox"/> No consent list checked |  |
| <b>Diagnosis</b>                    |                                           |                                                                                                                        |  |
| <b>Date discussed at MDT</b>        |                                           | <b>Date of pathology report</b>                                                                                        |  |
| <b>Quantity of tissue available</b> |                                           |                                                                                                                        |  |
| <b>Project requesting tissue</b>    |                                           |                                                                                                                        |  |

| APPROVAL DECISION                     |                                                                                                                             |
|---------------------------------------|-----------------------------------------------------------------------------------------------------------------------------|
| <b>Tissue release</b>                 | <input type="checkbox"/> Approved<br><input type="checkbox"/> Not approved                                                  |
| <b>Tissue released to</b>             | <input type="checkbox"/> Biobank – any ethically approved project<br><input type="checkbox"/> Condition – specified project |
| <b>Quantity of tissue to transfer</b> | <input type="checkbox"/> All available<br><input type="checkbox"/> Portion (specify).....                                   |
| <b>Date approved</b>                  |                                                                                                                             |
| <b>Signature</b>                      | Dr Rahul Phadke                                                                                                             |
| <b>Any comments</b>                   |                                                                                                                             |
