# Supplementary material for: MRC Centre Neuromuscular Biobank (Newcastle and London): Supporting and facilitating rare and neuromuscular disease research worldwide
Source: PubMed Central journal article supplement (PMC5678293; doi:10.1016/j.nmd.2017.07.001), 2017-11
Supplement: mmc4.pdf [file mmc4.pdf]

## Newcastle MRC Centre Biobank for Rare and Neuromuscular Diseases

PI: Prof. Hanns Lochmüller  
Institute of Genetic Medicine  
Newcastle University  
Central Parkway  
Newcastle upon Tyne  
NE1 3BZ  
+44 191 241 8602  
*hanns.lochmuller@ncl.ac.uk*

### Biopsy Referral Form

Forename

Male

Female

Surname

GC N°

DOB

*Complete if sample is part of a study*

Study Title

Patient ID

Study Visit

Muscle

Skin

Nerve

Other

Diagnosis /  
Mutation

Relevant  
Clinical  
Details

Ambulant

Ambulant Long Distances (Wheelchair Use)

Ambulant Short Distances (Wheelchair Use)

Non-Ambulant (Wheelchair Bound)

Consultant

Biopsy  
Performed by

Consent  
Obtained by

Date

#### **Biobank Use Only**

Date  
Proliferated:

Additional  
Information:

Date  
Frozen:

Storage  
Location:
